# Supplementary material for: Bariatric Surgery in Super-Superobese Patients Maintains Metabolic Improvement Beyond The Failure in Expected Weight Loss.
Source: Research Square preprint supplement (doi:10.21203/rs.3.rs-917329/v1), 2021-09-30
Supplement: Supplementary file 1 [file c8a53604886dd1b18ce48cba.xlsx]

## Sheet: גיליון1
גיל	מין	גובה	משקל	BMI	משקל אקטואל	BMI	NORMAL WEIGHT	OVERWEIGHT LOST	DIFFE	%	25	50	ניתוח קונבר.	ניתוח BAR קודם	חי/מת	ימי אשפוז	אבחנה 1	אבחנה 2	אבחנה 3	תאריך ניתוח	ניתוח 1	ניתוח 2	ניתוח 3	זמן תחילת הרדמה	זמן סיום הרדמה			משך הניתוח	רוויזיה	כמות מנות דם	מעל 13 WBC	חום מעל 38	דופק מעל 110	אשפוז חוזר באסותא	REVISIONAL	אשפוז חוזר בבית חולים אחר	ניתוח נוסף	מחלות רקע	תרופות	עכשיו
31	זכר	189	226	63.2681	130	36.3932	89.3025	70.2281	136.697	96	34.1744	68.2121		NO	חי	3	278.01 : Morbid obesity	NULL	NULL	2017-12-10 14:11:25	SAGBP	NULL	NULL	2017-12-10 09:23:00	2017-12-10 11:56:00	70.2281	36	153	0	0	0	0	0	0	0	0	NULL	Fatty liver		NOTHING
25	נקבה	165	166	60.9734	80	29.3848	68.0625	87.8111	97.9375	86	24.4844	48.8708		NO	חי	2	278.01 : Morbid obesity	NULL	NULL	2016-02-28 16:24:38	LSG	NULL	NULL	2016-02-28 11:12:00	2016-02-28 12:51:00	87.8111	59	99	0	0	0	0	0	0	0	0	NULL	Fatty liver, Hyperlipidemia DIABETES	GLUCOMIN PROZAC	ללא סוכרת כרגע
43	נקבה	156	152	62.4589	115	47.2551	60.84	40.588	91.16	37	22.79	45.4888		NO	חי	2	NULL	NULL	NULL	2010-11-22 11:15:46	LSG	NULL	NULL	2010-11-22 10:15:00	2010-11-24 15:05:00	40.588	21	317	0	0	0	0	0	0	0	0	POVH	SLEEP APNEA	NO	NOTHING	POVH
58	זכר	169	195.4	68.415	125	43.766	71.4025	56.7753	123.998	70.4	30.9994	61.8748		NO	חי	3	NULL	NULL	NULL	2012-05-14 14:32:29	LSG	NULL	NULL	2012-05-14 07:30:00	2012-05-14 08:47:00	56.7753	103	77	0	0	0	0	0	0	0	0	NULL	DIABETES HTN	סוכרת מאוזנת ללא תרופה TRITACE
49	נקבה	170	174	60.2076	122	42.2145	72.25	51.1057	101.75	52	25.4375	50.7733	LAP BAND X2	YES	חי	2	NULL	NULL	LAP BAND X3	2015-06-09 15:21:35	SAGBP	NULL	NULL	2015-06-09 16:21:00	2015-06-09 18:04:00	51.1057	64	103	0	0	0	0	0	0		0	LAP BAND X3	DIABETES-HYPERLIPIDEMIA-FATTY LIVER-PSORIASIS	CHOLECSTECTOMY	DIAB FATTY NORMAL HYPERL BETTER
45	נקבה	165	198	72.7273	131	48.1175	68.0625	51.5633	129.938	67	32.4844	64.8388	שרוול	YES	חי	3	NULL	NULL	SLEEVE GASTRECTOMY	2014-05-09 13:23:36	LSG	תיקון בקע סרעפתי	NULL	2014-05-09 07:30:00	2014-05-09 09:36:00	51.5633	79	126	0	0	0	0	0	0		0	עברה שרוול קיבה 2014 ואחכ מיני מעקף 2019	Fatty liver DEPRESSION BACK PAIN SLEEP APNEA BIPOLAR	שפור פרט דיכאון
47	נקבה	175	185.6	60.6041	109	35.5918	76.5625	70.2511	109.037	76.6	27.2594	54.4097		NO	חי	2	277.7 : Dysmetabolic syndrome X	NULL	NULL	2017-01-15 16:05:53	LSG	NULL	NULL	2017-01-15 18:06:00	2017-01-15 19:02:00	70.2511	47	78	0	0	0	0	0	0	0	0	NULL	Fatty liver	CONDOR AMLOW
43	נקבה	155	214	89.0739	166	69.0947	60.0625	31.1815	153.938	48	38.4844	76.8148		NO	חי	3	NULL	NULL	NULL	2015-10-13 15:04:32	SAGBP	NULL	NULL	2015-10-13 19:08:00	2015-10-13 21:02:00	31.1815	62	114	0	0	0	0	0	0	0	0	NULL	HTN-ASTHMA-SLEEP APNEA-FATTY LIVER-SVT-FAST GLUC-KNEE PAIN		HTN SAME- ASTHMA BETTER-SLEEP NORMAL-FATTY BETTER
68	נקבה	168	174.4	61.7914	110	38.9739	70.56	62.0185	103.84	64.4	25.96	51.8162		NO	חי	2	NULL	NULL	NULL	2015-09-01 15:20:17	SAGBP	NULL	NULL	2015-09-01 16:56:00	2015-09-01 18:18:00	62.0185	63	82	0	0	0	0	0	0	0	0	NULL	HTN	VASODIP	NO CHANGE	CHOLECYSTECTOMY
45	נקבה	157	163	66.1284	143	58.0145	61.6225	19.7282	101.377	20	25.3444	50.5874	0	YES	חי	2	NULL	NULL	LAP BAND	2013-02-25 13:14:29	LSG	הוצאת טבעת	NULL	2013-02-25 07:43:00	2013-02-25 09:52:00	19.7282	94	129	0	0	0	0	0	0	1	0	טבעת שרוול	DIABETES KNEE PAIN	ללא שיפור
29	זכר	184	220	64.9811	211	62.3228	84.64	6.64894	135.36	9	33.84	67.5446		NO	חי	2	NULL	NULL	NULL	2014-03-18 12:21:29	LSG	NULL	NULL	2014-03-18 18:31:00	2014-03-18 19:36:00	6.64894	81	65	0	0	0	0	0	0	0	0	NULL	NULL	בריא
28	נקבה	147	131.5	60.8543	80	37.0216	54.0225	66.4709	77.4775	51.5	19.3694	38.6613		NO	חי	5	NULL	NULL	NULL	2016-07-31 14:14:26	LSG	NULL	NULL	NULL	NULL	66.4709	53	65	NULL	NULL	NULL	NULL	NULL	NULL	0	NULL	NULL	ASTHMA
49	נקבה	153	141	60.2332	115	49.1264	58.5225	31.5237	82.4775	26	20.6194	41.1563		NO	חי	3	NULL	NULL	NULL	2011-06-26 14:44:01	LSG	NULL	NULL	2011-06-26 18:40:00	2011-06-26 21:06:00	31.5237	114	146	0	0	0	0	0	0	0	0	NULL	HTN BACK PAIN KNEE PAIN
31	זכר	180	196.6	60.679	109	33.642	81	75.7785	115.6	87.6	28.9	57.6844	0	NO	חי	3	278.01 : Morbid obesity	NULL	NULL	2017-09-03 18:58:44	LSG	NULL	NULL	2017-09-03 16:28:00	2017-09-03 17:57:00	75.7785	39	89	0	0	0	0	0	0	0	0	NULL	Fatty liver DIABETES	GLUCOPHAGE	ללא טיפול
33	זכר	183	202.5	60.4676	150	44.7908	83.7225	44.2003	118.777	52.5	29.6944	59.27		NO	חי	2	NULL	NULL	NULL	2011-09-05 11:56:37	LSG	NULL	NULL	NULL	NULL	44.2003	111	115	NULL	NULL	NULL	NULL	NULL	NULL	0	NULL	NULL	NULL		NOTHING
51	נקבה	160	180	70.3125	154	60.1562	64	22.4138	116	26	29	57.884		NO	חי	5	NULL	NULL	NULL	2011-02-09 09:00:19	LSG	NULL	NULL	2011-02-09 08:33:00	2011-02-09 13:45:00	22.4138	118	312	0	0	0	0	0	0	0	0	NULL	HTN-CIRRHOSIS HEP AUTOIMMUNE-PSORIASIS-FATTY LIVER		HTN BETTER	OMEPRADEX
44	זכר	174	216.2	71.4097	210	69.3619	75.69	4.4125	140.51	6.2	35.1275	70.1145		NO	חי	3	NULL	NULL	NULL	2011-03-14 13:09:13	LSG	NULL	NULL	2011-03-14 07:23:00	2011-03-14 22:17:00	4.4125	117	194	0	0	0	0	0	0	0	0	NULL	NULL	ללא בעיוטת
22	זכר	169	191.7	67.1195	105	36.7634	71.4025	72.0713	120.297	86.7	30.0744	60.0285		YES	חי	3	NULL	NULL	LAP BAND REMOVAL	2012-06-11 16:58:40	LSG	NULL	NULL	NULL	NULL	72.0713	105	125	NULL	NULL	NULL	NULL	NULL	NULL	1	NULL	עבר טבעת, הוצאת טבעת, ואחכ שרוול	GERD	REFLUX
26	זכר	163	177	66.619	85	31.9922	66.4225	83.1996	110.578	92	27.6444	55.1782		yes	חי	2	278.01 : Morbid obesity	NULL	SLEEVE GASTRECTOMY	2016-11-06 15:36:23	LSG	NULL	NULL	2016-11-06 17:38:00	2016-11-06 18:43:00	83.1996	49	65	0	0	0	0	0	0	1	0	שרוול מעקף	DIABETES FATTY LIVE		ALL NORMAL	שרוול ומעקף קיבה
37	זכר	176	187	60.3693	107	34.5429	77.44	73.0194	109.56	80	27.39	54.6704		NO	חי	5	278.01 : Morbid obesity	NULL	NULL	2017-12-04 10:01:56	SAGBP	NULL	NULL	2017-12-04 07:14:00	2017-12-04 10:29:00	73.0194	36	195	0	0	0	0	0	0	0	0	NULL	Fatty liver HTN DRUG ALCOHOL DEPRESSION	DEPALEPT CHRO 500*1 MIRO 30*1 FLUTIN 40RISPERDAL 2*1	NEOBLOCK
47	נקבה	167	195.2	69.9918	82	29.4023	69.7225	90.2154	125.477	113.2	31.3694	62.6133	0	NO	חי	3	NULL	NULL	NULL	2014-03-06 16:01:26	LSG	NULL	NULL	2014-03-06 16:41:00	2014-03-06 18:03:00	90.2154	81	82	0	0	0	0	0	0	0	0	NULL	NULL	ללא	ללא טיפול
33	זכר	183	202.5	60.4676	150	44.7908	83.7225	44.2003	118.777	52.5	29.6944	59.27		NO	חי	2	NULL	NULL	NULL	2008-04-06	LSG	NULL	NULL	NULL	NULL	44.2003	152	78	NULL	NULL	NULL	NULL	NULL	NULL	0	NULL	NULL	NULL		NOTHING
59	נקבה	157	157.4	63.8565	136	55.1747	61.6225	22.3435	95.7775	21.4	23.9444	47.793		NO	חי	2	NULL	NULL	NULL	2016-01-26 23:23:04	LSG	NULL	NULL	2016-01-26 19:25:00	2016-01-26 20:18:00	22.3435	59	62	0	0	0	0	0	0	0	0	NULL	HTN DIABETES	HTN ENALADEX DIABETES- GLUCOMIN	METOPROLOL ELIQUIZ AF
27	זכר	169	179.4	62.8129	169	59.1716	71.4025	9.62985	107.998	10.4	26.9994	53.8908	0	YES	חי	2	NULL	NULL	LAP BAND	2013-01-27 17:21:33	LRYGBP	הוצאת טבעת	NULL	2013-01-27 18:40:00	2013-01-27 20:42:00	9.62985	95	122	0	0	0	0	0	0	1	0	טבעת ROUX GBP	NULL	ללא	ללא טיפול
37	נקבה	154	163	68.73	92	38.7924	59.29	68.4601	103.71	71	25.9275	51.7513		NO	חי	3	278.01 : Morbid obesity	NULL	NULL	2016-12-25 14:17:54	LSG	NULL	NULL	2016-12-25 13:01:00	2016-12-25 14:33:00	68.4601	48	92	0	0	0	0	0	0	0	0	NULL	Fatty liver	DIABETES NO TREATMEN	OMEPRADEX REFLUX
55	זכר	178	222	70.0669	140	44.1863	79.21	57.427	142.79	82	35.6975	71.2522		NO	חי	3	278.01 : Morbid obesity	NULL	NULL	2018-10-21 13:43:55	SAGBP	NULL	NULL	2018-10-21 07:10:00	2018-10-21 09:47:00	57.427	26	157	0	0	0	0	0	0	0	0	NULL	Fatty liver, Hyperlipidemia DIABETES HTN	ללא סוכרת שיפור בי"ל
22	נקבה	172	182.6	61.7226	100	33.8021	73.96	76.0309	108.64	82.6	27.16	54.2114		NO	חי	2	278.01 : Morbid obesity	NULL	NULL	2017-12-12 17:58:34	SAGBP	NULL	NULL	2017-12-12 16:13:00	2017-12-12 17:33:00	76.0309	36	80	0	0	0	0	0	0	0	0	NULL	Fatty liver		NOTHING
60	נקבה	153	150	64.0779	97	41.4371	58.5225	57.9377	91.4775	53	22.8694	45.6473	0	NO	חי	3	574.20 : Calculus of gallbladder without mention of cholecy	277.7 : Dysmetabolic syndrome X	LAP BAND REMOVAL	2017-06-22 14:11:25	LRYGBP	NULL	NULL	2017-06-22 18:00:00	2017-06-22 20:33:00	57.9377	42	153	0	0	0	0	0	0	0	0	מעקף קיבה	Fatty liver HTN DIABETES	NO CHANGES	שיפור סוכר תקין
39	נקבה	156	150	61.6371	128	52.597	60.84	24.6747	89.16	22	22.29	44.4908		YES	חי	NULL	NULL	NULL	LAP BAND	2016-10-30 13:33:06	LRYGBP	הוצאת טבעת	NULL	NULL	NULL	24.6747	50	112	NULL	NULL	NULL	NULL	NULL	NULL	1	NULL	NULL	NULL
49	זכר	178	193	60.914	150	47.3425	79.21	37.7889	113.79	43	28.4475	56.7812		NO	חי	NULL	NULL	NULL	NULL	2011-08-08 10:01:32	LSG	NULL	NULL	NULL	NULL	37.7889	112	95	NULL	NULL	NULL	NULL	NULL	NULL	0	NULL	NULL	NULL	ASPIRIN
53	נקבה	155	145	60.3538	143	59.5213	60.0625	2.35467	84.9375	2	21.2344	42.3838		YES	מת	3	NULL	NULL	LAP BAND SLEEVE	2015-11-11 13:48:38	SAGBP	תיקון בקע סרעפתי		2015-11-11 08:10:00	2015-11-11 10:40:00	2.35467	73	150	0	0	0	0	0	0	1	0	DIAPHRAGMATIC HERNIABAND	DIABETES HTN HIPOTHIR HIATAL HERNIA	ELTRO-CARDILOC GLUCOMIN TRITACE NEXIUM		BAND 2011 REMOVAL 2013
35	זכר	174	185	61.1045	100	33.0295	75.69	77.7605	109.31	85	27.3275	54.5457		NO	חי	2	NULL	NULL	NULL	2016-01-10 15:58:41	LSG	NULL	NULL	2016-01-10 10:14:00	2016-01-10 11:36:00	77.7605	59	82	0	0	0	0	0	0	0	0	NULL	Fatty liver, Hyperlipidemia	CHOLECYSTECTOMY	ללא טיפול
51	נקבה	152	141.4	61.2015	117	50.6406	57.76	29.1726	83.64	24.4	20.91	41.7364		NO	חי	2	NULL	NULL	NULL	2012-08-19 17:37:27	LSG	NULL	NULL	2012-08-19 20:45:00	2012-08-19 22:05:00	29.1726	100	80	0	0	0	0	0	0	0	0	NULL	HTN DIABETES		HTN	NO CHANGES
49	זכר	178	193	60.914	150	47.3425	79.21	37.7889	113.79	43	28.4475	56.7812		NO	חי	NULL	NULL	NULL	NULL	2008-05-15	LSG	NULL	NULL	NULL	NULL	37.7889	151	79	NULL	NULL	NULL	NULL	NULL	NULL	0	NULL	NULL	NULL	ASPIRIN
45	זכר	177	197.6	63.0726	184	58.7315	78.3225	11.402	119.277	13.6	29.8194	59.5195		YES	חי	6	NULL	NULL	LAP BAND	2009-06-22	LSG	הוצאת טבעת	כריתת כיס מרה	2009-06-22 08:10:00	2009-06-22 11:35:00	11.402	138	205	0	0	1	0	0	0	1	0	טבעת שרוול	HTN DIABETES	DIABETES HTN NORMOLOL GLUCOMIN
41	זכר	172	182	61.5197	114	38.5343	73.96	62.9397	108.04	68	27.01	53.912		NO	חי	4	278.01 : Morbid obesity	NULL	NULL	2016-06-08 12:09:52	LSG	NULL	NULL	2016-06-08 12:09:00	2016-06-08 14:12:00	62.9397	54	123	0	0	0	0	0	0	0	0	NULL	Fatty liver, Hyperlipidemia	OMEPRADEX REFLUX
52	נקבה	169	187.2	65.5439	142	49.7181	71.4025	39.0337	115.797	45.2	28.9494	57.783		NO	מת	3	NULL	NULL	NULL	2013-01-14 08:55:18	LSG	NULL	NULL	2013-01-14 07:43:00	2013-01-14 09:09:00	39.0337	95	86	0	0	0	0	0	0	0	0	NULL	Fatty liver
45	נקבה	163	169	63.608	160	60.2206	66.4225	8.77385	102.578	9	25.6444	51.1862		NO	חי	3	NULL	NULL	NULL	2010-11-14 09:51:01	LSG	כריתת כיס מרה	NULL	2010-11-14 07:56:00	2010-11-14 07:58:00	8.77385	121	288	0	0	0	0	0	0	0	0	NULL	DIABETES	DISBETES DIETA
31	נקבה	153	150	64.0779	97	41.4371	58.5225	57.9377	91.4775	53	22.8694	45.6473		YES	חי	NULL	NULL	NULL	LAP BAND	2016-05-19 15:44:43	LSG	הוצאת טבעת	NULL	NULL	NULL	57.9377	55	92	NULL	NULL	NULL	NULL	NULL	NULL	1	NULL	NULL	GERD	BAND	OMEPRADEX
31	נקבה	157	148	60.043	121	49.0892	61.6225	31.2581	86.3775	27	21.5944	43.1024		NO	חי	2	NULL	NULL	NULL	2013-04-10 11:10:36	LSG	NULL	NULL	2013-04-10 10:41:00	2013-04-10 12:34:00	31.2581	92	113	0	0	0	0	0	0	0	0	NULL	SUPRAVENTR TACHICARDIA- FASTING GLUCOSE-KNEE PAIN HTN SLEEP APNEA ASTHMA		HTN SAME ASTHMA BETTER-NO SLEEP APNEA FATTY LIVER
48	נקבה	167	170	60.9559	129	46.2548	69.7225	40.8865	100.278	41	25.0694	50.0385		YES	חי	0	NULL	NULL	LAP BAND	2009-10-11 10:16:50	LRYGBP	כריתת כיס מרה	NULL	2009-10-11 09:17:00	2009-10-11 13:56:00	40.8865	134	279	0	0	0	0	0	0	1	0	טבעת ומעקף +כיס מרה	BREAST CANCER-FIBROMIALGIA	טבעת 96 הוצאה טבעת
46	נקבה	115	85	64.2722	46	34.7826	33.0625	75.0903	51.9375	39	12.9844	25.9168		NO	חי	3	278.01 : Morbid obesity	NULL	NULL	2017-08-13 14:30:05	LSG	NULL	NULL	2017-08-13 17:54:00	2017-08-13 19:14:00	75.0903	41	80	0	0	0	0	0	0	0	0	NULL	Hyperlipidemia DIABETES	NO TREATMENT
38	נקבה	155	145.5	60.5619	84	34.9636	60.0625	71.9824	85.4375	61.5	21.3594	42.6333		NO	חי	3	NULL	NULL	NULL	2016-12-20 10:05:45	LSG	NULL	NULL	NULL	NULL	71.9824	48	160	NULL	NULL	NULL	NULL	NULL	NULL	0	NULL	NULL	NULL	NO DISEASE
26	זכר	175	216	70.5306	178	58.1224	76.5625	27.2524	139.438	38	34.8594	69.5793		NO	חי	5	NULL	NULL	NULL	2011-03-27 09:15:29	LSG	NULL	NULL	2011-03-27 07:28:00	2011-03-27 09:09:00	27.2524	117	101	0	0	0	0	0	0	0	0	NULL	CPAP SLEEP APNEA	CPAP	DEPRESSION
33	נקבה	159	153	60.5198	131	51.8176	63.2025	24.4996	89.7975	22	22.4494	44.809		yes	חי	5	NULL	NULL	SLEEVE GASTRECTOMY	2017-07-30 13:31:28	LSG	NULL	NULL	NULL	NULL	24.4996	41	80	NULL	NULL	NULL	NULL	NULL	NULL	1	NULL	שרוול מעקף	UVEITIS FATTY LIVER- פוריות RA	שרוול 2014, ירדה 153 BMI 56			IMURAN 100 PREDNISONE 2ץ5 HUMIRA 40
56	נקבה	151	142	62.278	92	40.3491	57.0025	58.8253	84.9975	50	21.2494	42.4138		YES	חי	0	NULL	NULL	LAP BAND X3 SLEEVE	2009-01-07 10:17:03	LRYGBP		NULL	2009-01-07 08:08:00	2009-01-07 13:14:00	58.8253	143	306	0	0	0	0	0	0	1	0	LAP BAND X3	DIABETES HTN	93 BAND 2007 SLEEVE 2009 MGBP	DUMPING	DIABETES תרופה 1	DUPLEX CVA
28	נקבה	147	131.5	60.8543	80	37.0216	54.0225	66.4709	77.4775	51.5	19.3694	38.6613		NO	חי	9	NULL	NULL	NULL	2011-03-30 10:50:55	LSG	NULL	NULL	2011-03-30 08:26:00	2011-03-30 10:14:00	66.4709	117	108	0	0	0	0	0	0	0	0	NULL	ASTHMA
51	נקבה	160	171	66.7969	133	51.9531	64	35.514	107	38	26.75	53.393		NO	חי	4	278.01 : Morbid obesity	NULL	NULL	2016-11-07 15:34:51	LSG	NULL	NULL	2016-11-07 10:24:00	2016-11-07 13:27:00	35.514	37	183	0	0	0	0	0	0	0	0	NULL	Fatty liver HTN	HTN CONDOR DIABETES
48	נקבה	155	153.6	63.9334	96.4	40.1249	60.0625	61.1519	93.5375	57.2	23.3844	46.6752		NO	חי	2	278.01 : Morbid obesity	NULL	NULL	2017-11-28 10:13:24	SAGBP	NULL	NULL	2017-11-28 15:28:00	2017-11-28 16:43:00	61.1519	25	75	0	0	0	0	0	0	0	0	NULL	Fatty liver DIABETES ASTHMA HYPERLIPIDEMIA		ALL NORMAL
40	נקבה	156	152.6	62.7055	133	54.6515	60.84	21.3601	91.76	19.6	22.94	45.7882		NO	חי	5	NULL	NULL	NULL	2010-10-04 11:13:38	LSG	NULL	NULL	2010-10-04 07:40:00	2010-10-04 09:19:00	21.3601	122	99	0	0	0	0	0	0	0	0	NULL	NULL		NOTHING
39	נקבה	160	182	71.0937	148	57.8125	64	28.8136	118	34	29.5	58.882		NO	חי	4	278.01 : Morbid obesity	NULL	NULL	2019-08-18 14:06:45	LSG	NULL	NULL	2019-08-18 07:11:00	2019-08-18 09:33:00	28.8136	16	142	0	0	0	0	0	0	0	0	NULL	Fatty liver	בריא
42	זכר	162	158.8	60.5091	130	49.5351	65.61	30.9046	93.19	28.8	23.2975	46.5018		NO	חי	NULL	NULL	NULL	NULL	2011-11-13 10:30:07	LSG	NULL	NULL	NULL	NULL	30.9046	109	101	NULL	NULL	NULL	NULL	NULL	NULL	0	NULL	NULL	NULL		NOTHING
69	נקבה	165	165	60.6061	79	29.0174	68.0625	88.717	96.9375	86	24.2344	48.3718							NULL	2019-05-03	SAGBP					88.717	19	95							0			DIABETES HTN HYPO-HYPERLIPIDEMIA	losardex plus eltroxin simovil	NO DIABETES BETTER HTN HYPERLIPIDEMIA BETTER	CHOLECYSTECTOMY
18	נקבה	168	170	60.2324	110	38.9739	70.56	60.3379	99.44	60	24.86	49.6206							NULL	2019-12-06	SAGBP					60.3379	12	145							0
47	נקבה	154	147	61.9835	88	37.1058	59.29	67.2671	87.71	59	21.9275	43.7673							NULL	2019-05-13	SAGBP					67.2671	12	83							0			SLEEP APNEA PSEUDO TUMOR CER	NULL	NORMAL
36	נקבה	158	153	61.2883	72	28.8415	62.41	89.4138	90.59	81	22.6475	45.2044							NULL	2018-10-30	SAGBP					89.4138	26	94							0			NULL
33	נקבה	149	134	60.3576	65	29.278	55.5025	87.9009	78.4975	69	19.6244	39.1703							NULL	2019-08-12	SAGBP					87.9009	16	89							0			NULL
33	זכר	180	198	61.1111	153	47.2222	81	38.4615	117	45	29.25	58.383							NULL	2018-05-03	SAGBP					38.4615	31	110							0			NULL
42	נקבה	162	163	62.1094	117	44.5816	65.61	47.2328	97.39	46	24.3475	48.5976		NO	חי	2	553.3 : Diaphragmatic hernia without mention of obstructio	277.7 : Dysmetabolic syndrome X	NULL	2016-09-18 15:25:19	LSG	NULL	NULL	2016-09-18 22:05:00	2016-09-18 23:19:00	47.2328	53	74	0	0	0	0	0	0	0	0	NULL	NULL		NOTHING
51	נקבה	152	141.4	61.2015	117	50.6406	57.76	29.1726	83.64	24.4	20.91	41.7364		NO	חי	2	NULL	NULL	NULL	2011-01-02 10:34:56	LSG	NULL	NULL	NULL	NULL	29.1726	119	185	NULL	NULL	NULL	NULL	NULL	NULL	0	NULL	NULL	NULL
41.4833		163.75	171.96	63.8052	121.84	45.109				49.3424																	72.1333	126.15
										49.3424
										47.9075
																																						ROUX GBP
							0.1833		0.25	11																												SLEEVE
							0.4833		0.499	29																											טבעת	SLEEVE
																																						SLEEVE
																																						ROUX GBP
																				SLEEVE GASTRECTOMY	0.4666																	REMOVAL- MGBP
																				SLEEVE REV	0.5061																	MGBP
																				SLEEVE ONLY	0.4582																	SLEEVE
																																					SLEEVE	MGBP
																				ROUX	0.6088																	RE SLEEVE
																		46.66																				RE SLEEVE
																		60.88																				ROUX GBP
																		65.02		MINI	0.6502																	RE SLEEVE
																		50.9		MINI ONLY	0.7288																GBP
																				MINI REV	0.27
																							TYPE OF SURGERY
																		LSG	45.27	CI	SD	Mean	N	type
																		LRYGBP	38.39	1900-01-04 03:07:12	26.16	46.66	40	LSG					0.022	1-2
																		LSAGBP	61.11	1900-01-07 08:52:48	16.48	35.28	5	Roux en y					0.036	2-3
																		PRIMARY	48.54	1900-01-05 09:21:36	21.56	64.28	15	MGBP	p=0.030
																		REVISIONAL	36.38
																				1900-01-03 17:02:24	25.22	52.66	49	Primary	p=0.169
																				1900-01-07 05:16:48	27.01	41.76	11	Revision
																									BIsecurity888

## Sheet: Sheet9
86		48.8708		60.9734	29.3848
37		45.4888		62.4589	47.2551
70.4		61.8748		68.415	43.766
67		64.8388		72.7273	48.1175
76.6		54.4097		60.6041	35.5918
20		50.5874		66.1284	58.0145
9		67.5446		64.9811	62.3228
51.5		38.6613		60.8543	37.0216
26		41.1563		60.2332	49.1264
87.6		57.6844		60.679	33.642
52.5		59.27		60.4676	44.7908
26		57.884		70.3125	60.1562
6.2		70.1145		71.4097	69.3619
86.7		60.0285		67.1195	36.7634
92		55.1782		66.619	31.9922
113.2		62.6133		69.9918	29.4023
52.5		59.27		60.4676	44.7908
21.4		47.793		63.8565	55.1747
71		51.7513		68.73	38.7924
43		56.7812		60.914	47.3425
85		54.5457		61.1045	33.0295
24.4		41.7364		61.2015	50.6406
43		56.7812		60.914	47.3425
13.6		59.5195		63.0726	58.7315
68		53.912		61.5197	38.5343
45.2		57.783		65.5439	49.7181
9		51.1862		63.608	60.2206
53		45.6473		64.0779	41.4371
27		43.1024		60.043	49.0892
39		25.9168		64.2722	34.7826
61.5		42.6333		60.5619	34.9636
38		69.5793		70.5306	58.1224
22		44.809		60.5198	51.8176
51.5		38.6613		60.8543	37.0216
38		53.393		66.7969	51.9531
19.6		45.7882		62.7055	54.6515
34		58.882		71.0937	57.8125
28.8		46.5018		60.5091	49.5351
46		48.5976		62.1094	44.5816
24.4		41.7364		61.2015	50.6406
46.665		52.3128		64.0046	46.4359

## Sheet: Sheet7
%BWLOSS	FOLLOW UP						less than 2 y.	2-5 years	5-10 years	more than 10 y.
70.2281	36							70.2281
87.8111	59							87.8111
40.588	21						40.588	70.2511
56.7753	103						28.8136	66.4709
51.1057	64						88.717	75.7785
51.5633	79						60.3379	83.1996
70.2511	47						67.2671	73.0194
31.1815	62						87.9009	22.3435
62.0185	63							68.4601
19.7282	94							57.427
6.64894	81							76.0309
66.4709	53							57.9377
31.5237	114							24.6747
75.7785	39							77.7605
44.2003	111							62.9397
22.4138	118							57.9377
4.4125	117							75.0903
72.0713	105							71.9824
83.1996	49							24.4996
73.0194	36							35.514
90.2154	81							61.1519
44.2003	152							89.4138
22.3435	59							38.4615
9.62985	95							47.2328
68.4601	48
57.427	26
76.0309	36
57.9377	42
24.6747	50
37.7889	112
2.35467	73
77.7605	59
29.1726	100
37.7889	151
11.402	138
62.9397	54
39.0337	95
8.77385	121
57.9377	55
31.2581	92
40.8865	134
75.0903	41
71.9824	48
27.2524	117
24.4996	41
58.8253	143
66.4709	117
35.514	37
61.1519	25
21.3601	122
28.8136	16						28.8136
30.9046	109
88.717	19						88.717
60.3379	12						60.3379
67.2671	12						67.2671
89.4138	26
87.9009	16						87.9009
38.4615	31
47.2328	53
29.1726	119

## Sheet: Sheet8
less than 2 y.	2-5 years	5-10 years	more than 10 y.							less than 2 y.	2-5 years	5-10 years	more than 10 y.
40.588	70.2281	56.7753	44.2003		40.588					62.2707	61.484	36.8216	31.891
28.8136	87.8111	51.1057	37.7889		28.8136
88.717	70.2511	51.5633	11.402		88.717
60.3379	66.4709	31.1815	8.77385		60.3379
67.2671	75.7785	62.0185	40.8865		67.2671
87.9009	83.1996	19.7282	58.8253		87.9009
62.2707	73.0194	6.64894	21.3601		70.2281
6	22.3435	31.5237	31.891		87.8111
22.266	68.4601	44.2003	7		70.2511
	57.427	22.4138	17.147		66.4709
	76.0309	4.4125			75.7785
	57.9377	72.0713			83.1996
	24.6747	90.2154			73.0194
	77.7605	9.62985			22.3435
	62.9397	37.7889			68.4601
	57.9377	2.35467			57.427
	75.0903	29.1726			76.0309
	71.9824	39.0337			57.9377
	24.4996	31.2581			24.6747
	35.514	27.2524			77.7605
	61.1519	66.4709			62.9397
	89.4138	30.9046			57.9377
	38.4615	29.1726			75.0903
	47.2328	36.8216			71.9824
	61.484	23			24.4996
	24	22.077			35.514
	19.351				61.1519
					89.4138
					38.4615
					47.2328
					56.7753
					51.1057
					51.5633
					31.1815
					62.0185
					19.7282
					6.64894
					31.5237
					44.2003
					22.4138
					4.4125
					72.0713
					90.2154
					9.62985
					37.7889
					2.35467
					29.1726
					39.0337
					31.2581
					27.2524
					66.4709
					30.9046
					29.1726
					44.2003
					37.7889
					11.402
					8.77385
					40.8865
					58.8253
					21.3601
					48.6562

## Sheet: Sheet5
2009	2453
2008	2545
2010	2536
2011	2651
2012	2827
2013	2956
2014	2984
2015	3173
2016	3268
2017	2968
2018	2749
2019	2616
	33726	60	0.177904
	33726

## Sheet: Sheet4
LSG	ROUX	MGBP	PRIMARY	REVISIOn
86	10.4	96	96	52
37	53	52	86	67
70.4	22	48	37	20
67	41	64.4	70.4	86.7
76.6	50	80	76.6	92
20	35.28	82	48	10.4
9		82.6	64.4	53
51.5		2	9	22
26		57.2	51.5	2
87.6		86	26	13.6
52.5		60	87.6	53
26		59	52.5	41
6.2		81	26	22
86.7		69	6.2	50
92		45	80	41.7643
113.2		64.28	113.2
52.5			52.5
21.4			21.4
71			71
43			82
85			82.6
24.4			43
43			85
13.6			24.4
68			43
45.2			68
9			45.2
53			9
27			27
39			39
61.5			61.5
38			38
22			51.5
51.5			38
38			57.2
19.6			19.6
34			34
28.8			28.8
46			86
24.4			60
46.665			59
			81
			69
			45
			46
			24.4
			52.663
SD	SD	SD	SD	SD
26.16	16.48	21.56	25.22	27.01
CI	CI	CI	CI	CI
4.13	7.37	5.39	3.71	7.22

## Sheet: Sheet2
DIS							FATTY	DIABETES	HTN	SA	DISL	BP	KNEE PAIN	GERD	ASTHMA	SVT	HYPOTHY	PTC	CIRRHOSIS	PSORIASIS	DRUGS	DEPRESSION	FIBRO	BRAST CA	INFERTILITY
Fatty liver		NOTHING					1
Fatty liver, Hyperlipidemia DIABETES	GLUCOMIN PROZAC	ללא סוכרת כרגע					1	1			1
SLEEP APNEA	NO	NOTHING	POVH							1
DIABETES HTN	סוכרת מאוזנת ללא תרופה TRITACE							1	1
DIABETES-HYPERLIPIDEMIA-FATTY LIVER-PSORIASIS	CHOLECSTECTOMY	DIAB FATTY NORMAL HYPERL BETTER						1	1		1
Fatty liver DEPRESSION BACK PAIN SLEEP APNEA BIPOLAR	שפור פרט דיכאון						1			1		1										1
Fatty liver	CONDOR AMLOW						1
HTN-ASTHMA-SLEEP APNEA-FATTY LIVER-SVT-FAST GLUC-KNEE PAIN		HTN SAME- ASTHMA BETTER-SLEEP NORMAL-FATTY BETTER					1	1	1	1			1		1	1
HTN	VASODIP	NO CHANGE	CHOLECYSTECTOMY						1
DIABETES KNEE PAIN	ללא שיפור							1					1
NULL	בריא
ASTHMA															1
HTN BACK PAIN KNEE PAIN									1			1	1
Fatty liver DIABETES	GLUCOPHAGE	ללא טיפול					1	1
NULL		NOTHING
HTN-CIRRHOSIS HEP AUTOIMMUNE-PSORIASIS-FATTY LIVER		HTN BETTER	OMEPRADEX				1		1										1	1
NULL	ללא בעיוטת
GERD	REFLUX													1
DIABETES FATTY LIVE		ALL NORMAL	שרוול ומעקף קיבה				1	1
Fatty liver HTN DRUG ALCOHOL DEPRESSION	DEPALEPT CHRO 500*1 MIRO 30*1 FLUTIN 40*1 RISPERDAL 2*1	NEOBLOCK					1														1	1
NULL	ללא	ללא טיפול
NULL		NOTHING
HTN DIABETES	HTN ENALADEX DIABETES- GLUCOMIN	METOPROLOL ELIQUIZ AF						1	1
NULL	ללא	ללא טיפול
Fatty liver	DIABETES NO TREATMEN	OMEPRADEX REFLUX					1
Fatty liver, Hyperlipidemia DIABETES HTN	ללא סוכרת שיפור בי"ל						1		1		1						1
Fatty liver		NOTHING					1
Fatty liver HTN DIABETES	NO CHANGES	שיפור סוכר תקין					1	1	1
NULL
NULL	ASPIRIN
DIABETES HTN HIPOTHIR HIATAL HERNIA	ELTRO-CARDILOC GLUCOMIN TRITACE NEXIUM		BAND 2011 REMOVAL 2013					1	1					1			1
Fatty liver, Hyperlipidemia	CHOLECYSTECTOMY	ללא טיפול					1				1
HTN DIABETES		HTN	NO CHANGES					1	1
NULL	ASPIRIN
HTN DIABETES	DIABETES HTN NORMOLOL GLUCOMIN							1	1
Fatty liver, Hyperlipidemia	OMEPRADEX REFLUX						1				1
Fatty liver							1
DIABETES	DISBETES DIETA							1
GERD	BAND	OMEPRADEX												1
SUPRAVENTR TACHICARDIA- FASTING GLUCOSE-KNEE PAIN HTN SLEEP APNEA ASTHMA		HTN SAME ASTHMA BETTER-NO SLEEP APNEA FATTY LIVER					1	1	1	1	1		1		1	1
BREAST CANCER-FIBROMIALGIA	טבעת 96 הוצאה טבעת																						1	1
Hyperlipidemia DIABETES	NO TREATMENT						1	1			1
NULL	NO DISEASE
CPAP SLEEP APNEA	CPAP	DEPRESSION								1
UVEITIS FATTY LIVER- פוריות RA	שרוול 2014, ירדה 153 BMI 56						1	1																	1
DIABETES HTN	93 BAND 2007 SLEEVE 2009 MGBP	DUMPING	DIABETES תרופה 1
ASTHMA								1	1
Fatty liver HTN	HTN CONDOR DIABETES						1		1
Fatty liver DIABETES ASTHMA HYPERLIPIDEMIA		ALL NORMAL					1		1		1				1
NULL		NOTHING					1
Fatty liver	בריא
NULL		NOTHING					1
DIABETES HTN HYPO-HYPERLIPIDEMIA	losardex plus eltroxin simovil	NO DIABETES BETTER HTN HYPERLIPIDEMIA BETTER	CHOLECYSTECTOMY					1	1		1						1
SLEEP APNEA PSEUDO TUMOR CER	NULL	NORMAL								1								1
NULL
NULL
NULL
NULL		NOTHING
NULL							23	18	17	6	9	2	4	3	4	2	3	1	1	1	1	2	1	1	1

## Sheet: Sheet3
23	7	10	6		30.4348	43.4783	26.087	100
18	7	7	4		38.8889	38.8889	22.2222	100
17	5	0	12		29.4118	0	70.5882	100
10	6	1	3		60	10	30	100
7	1	5	1		14.2857	71.4286	14.2857	100
5	2	3	0		40	60	0	100
4	3	0	1		75	0	25	100
2	1	0	1		50	0	50
2	1	0	1		50	0	50
3	1	2	0		33.3333	66.6667	0
2	0	0	2		0	0	100
1	0	0	1		0	0	100
1	0	0	1		0	0	100
1	1	0	0		100	0	0
1	0	0	1		0	0	100
3	0	0	3		0	0	100
1	0	1	0		0	100	0
1	1	0	0		100	0	0

## Sheet: Sheet1
23	38.3333
18	30
17	28.3333
10	16.6667
7	11.6667
5	8.33333
4	6.66667
2	3.33333
2	3.33333
3	5
2	3.33333
1	1.66667
1	1.66667
1	1.66667
1	1.66667
3	5
1	1.66667
1	1.66667
12	20

## Sheet: Sheet6
2017-12-10 09:23:00	30/9/2020	#VALUE!
2016-02-28 11:12:00	30/9/2020
2010-11-22 10:15:00	30/9/2020
2012-05-14 07:30:00	30/9/2020
2015-06-09 16:21:00	30/9/2020
2014-05-09 07:30:00	30/9/2020
2017-01-15 18:06:00	30/9/2020
2015-10-13 19:08:00	30/9/2020
2015-09-01 16:56:00	30/9/2020
2013-02-25 07:43:00	30/9/2020
2014-03-18 18:31:00	30/9/2020
2011-06-26 18:40:00	30/9/2020
2017-09-03 16:28:00	30/9/2020
2011-02-09 08:33:00	30/9/2020
2011-03-14 07:23:00	30/9/2020
2016-11-06 17:38:00	30/9/2020
2017-12-04 07:14:00	30/9/2020
2014-03-06 16:41:00	30/9/2020
2016-01-26 19:25:00	30/9/2020
2013-01-27 18:40:00	30/9/2020
2016-12-25 13:01:00	30/9/2020
2018-10-21 07:10:00	30/9/2020
2017-12-12 16:13:00	30/9/2020
2017-06-22 18:00:00	30/9/2020
2015-11-11 08:10:00	30/9/2020
2016-01-10 10:14:00	30/9/2020
2012-08-19 20:45:00	30/9/2020
2009-06-22 08:10:00	30/9/2020
2016-06-08 12:09:00	30/9/2020
2013-01-14 07:43:00	30/9/2020
2010-11-14 07:56:00	30/9/2020
2013-04-10 10:41:00	30/9/2020
2009-10-11 09:17:00	30/9/2020
2017-08-13 17:54:00	30/9/2020
2011-03-27 07:28:00	30/9/2020
2009-01-07 08:08:00	30/9/2020
2011-03-30 08:26:00	30/9/2020
2016-11-07 10:24:00	30/9/2020
2017-11-28 15:28:00	30/9/2020
2010-10-04 07:40:00	30/9/2020
2019-08-18 07:11:00	30/9/2020
2016-09-18 22:05:00	30/9/2020

[truncated: 1 more sheets: Sheet10]
